# Supplementary material for: A simple rapid detection method of DNA based on ligation-mediated real-time fluorescence PCR
Source: Royal Society of Chemistry journal article supplement (doi:10.1039/c3an00763d), 2013-01-01
Supplement: c3an00763d.pdf [file c3an00763d.pdf]

## Supporting Information

for

### A simple rapid detection method of DNA based on ligation-mediated real-time fluorescence PCR

Yu Qing Du,<sup>a</sup> Peng Fei Gao,<sup>a</sup> Wei Wang,<sup>a</sup> Ting Ting Wang,<sup>a</sup> Yong Chang,<sup>b</sup> Jian  
Wang\*<sup>a</sup> and Cheng Zhi Huang\*<sup>a,b</sup>

<sup>a</sup> Education Ministry Key Laboratory on Luminescence and Real-Time Analysis, College of  
Pharmaceutical Sciences, Southwest University, Chongqing 400716, China. E-mail:

[wj123456@swu.edu.cn](mailto:wj123456@swu.edu.cn), [chengzhi@swu.edu.cn](mailto:chengzhi@swu.edu.cn), Tel: (+86) 23 68254659, Fax: (+86) 23

68367257.

<sup>b</sup> School of Chemistry and Chemical Engineering, Southwest University, Chongqing 400715,  
China.

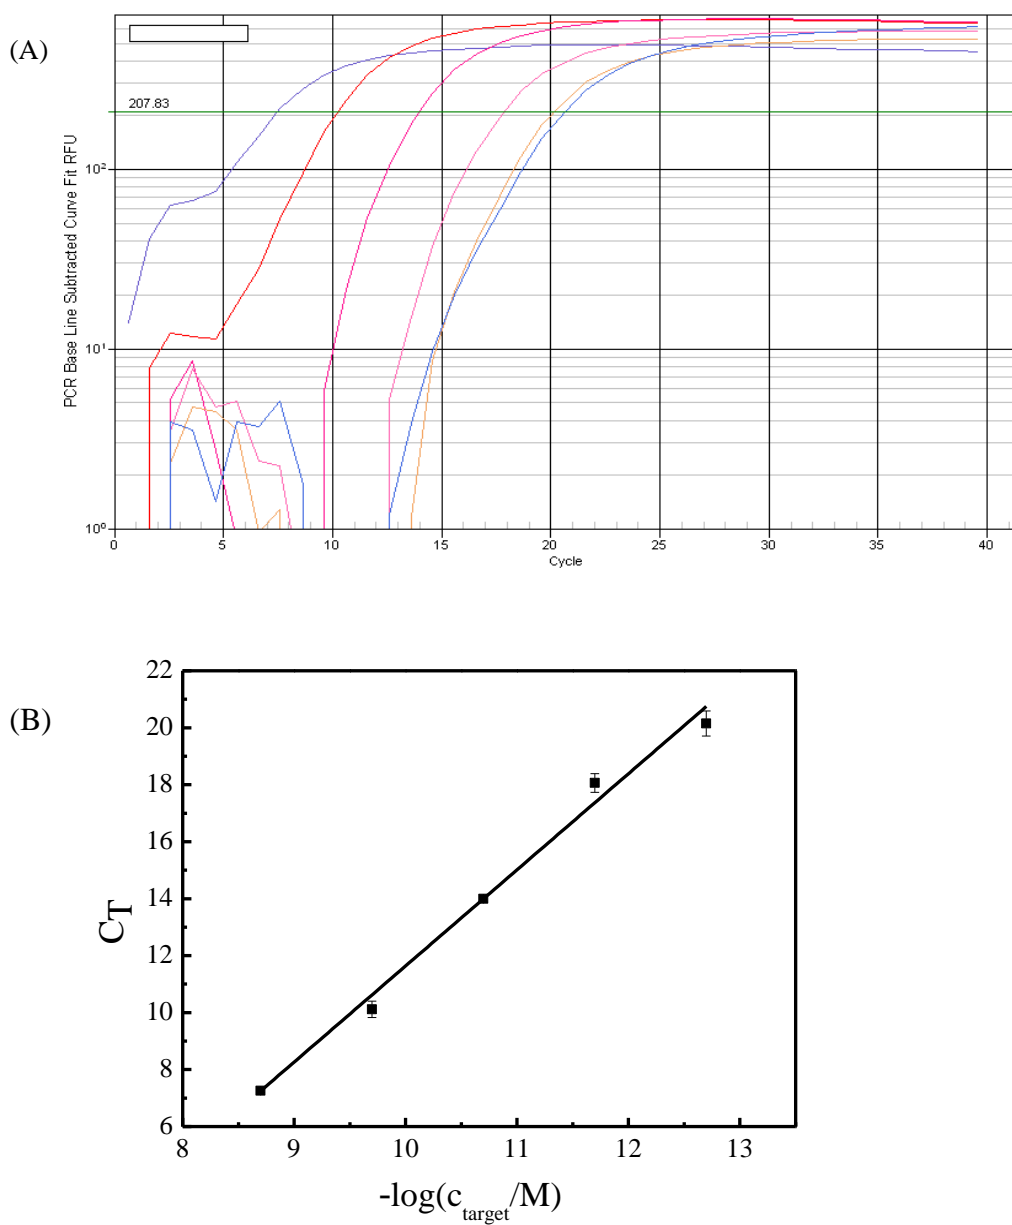

**Fig. S1** (A) Real-time PCR amplification plot of target DNA\*. From left to right, the concentration of target DNA is 2 nM, 200 pM, 20 pM, 2 pM, 200 fM, 0 M. (B) The linear relationship between  $C_T$  and the log of target DNA\* concentration. Data represent the mean of triplicate experiments.
